# Supplementary material
Source: Research Square preprint supplement (doi:10.21203/rs.3.rs-9391075/v1)
Supplement: Supplementary file 1 [file db7cd01daca42356168ece06.docx]

**Supplement Table 1.** Detailed sources of SNPs correlated with fruit and vegetable intake and fracture.

| GWAS ID | Trait | Year | Sample size (Case/control) | Population | PMID/ Consortium |
| --- | --- | --- | --- | --- | --- |
| **Exposure** | | | | | |
| [ukb-b-16576](https://gwas.mrcieu.ac.uk/datasets/ukb-b-16576/) | Dried fruit intake | 2018 | 421764 | European | MRC-IEU (UKB) |
| [ukb-b-3881](https://gwas.mrcieu.ac.uk/datasets/ukb-b-3881/) | Fresh fruit intake | 2018 | 446462 | European | MRC-IEU (UKB) |
| [ukb-b-1996](https://gwas.mrcieu.ac.uk/datasets/ukb-b-1996/) | Salad/raw vegetable intake | 2018 | 435435 | European | MRC-IEU (UKB) |
| [ukb-b-8089](https://gwas.mrcieu.ac.uk/datasets/ukb-b-8089/) | Cooked vegetable intake | 2018 | 448651 | European | MRC-IEU (UKB) |
| **Outcome** | | | | | |
| finn-b-M13_OSTEOPOROSIS | Osteoporosis | 2021 | 3203/209575 | European | MRC-IEU (FinnGEN) |
| finn-b-OSTEOPOROSIS_FRACTURE_FG | Osteoporosis with pathological fracture | 2021 | 785/172834 | European | MRC-IEU (FinnGEN) |
| finn-b-OSTPOPATFRCTURE_POSTEMENO | Postmenopausal osteoporosis with pathological fracture | 2021 | 621/ 122861 | European | MRC-IEU (FinnGEN) |
| finn-b-ST19_FRACT_WRIST_HAND_LEVEL | Fracture at wrist and hand level | 2021 | 5677/ 199036 | European | MRC-IEU (FinnGEN) |
| finn-b-ST19_FRACT_FEMUR | Fracture of femur | 2021 | 3983/ 211460 | European | MRC-IEU (FinnGEN) |
| finn-b-ST19_FRACT_FOOT_ANKLE | Fracture of foot, except ankle | 2021 | 3515/ 206804 | European | MRC-IEU (FinnGEN) |
| finn-b-ST19_FRACT_FOREA | Fracture of forearm | 2021 | 9956/ 205768 | European | MRC-IEU (FinnGEN) |
| finn-b-ST19_FRACT_LOWER_LEG_INCLU_ANKLE | Fracture of lower leg, including ankle | 2021 | 10489/ 191178 | European | MRC-IEU (FinnGEN) |
| finn-b-ST19_FRACT_LUMBAR_SPINE_PELVIS | Fracture of lumbar spine and pelvis | 2021 | 2859/ 212839 | European | MRC-IEU (FinnGEN) |
| finn-b-ST19_FRACT_NECK | Fracture of neck | 2021 | 664/ 215476 | European | MRC-IEU (FinnGEN) |
| finn-b-ST19_FRACT_RIBS_STERNUM_THORACIC_SPINE | Fracture of rib(s), sternum and thoracic spine | 2021 | 4070/211861 | European | MRC-IEU (FinnGEN) |
| finn-b-ST19_FRACT_SHOUL_UPPER_ARM | Fracture of shoulder and upper arm | 2021 | 5824/ 202866 | European | MRC-IEU (FinnGEN) |
| finn-b-ST19_FRACT_SKULL_FACIAL_BONES | Fracture of skull and facial bones | 2021 | 3467/ 196254 | European | MRC-IEU (FinnGEN) |

Note: SNPs, single-nucleotide polymorphisms; GWAS, genome-wide association studies; PMID, PubMed Unique Identifier; MRC-IEU, MRC Integrative Epidemiology Unit database.

**Supplement Table 2**. The screening process for instrumental variables.

| Exposure | Outcome | SNPs (P<5*10^-8) | Removing LD | Harmonized with outcome | Removing the SNPs for being palindromic with intermediate allele frequencies |
| --- | --- | --- | --- | --- | --- |
| Dried fruit intake | Osteoporosis | 43 | 43 | 43 | 41 |
| Osteoporosis with pathological fracture | 43 | 43 | 43 | 41 |
| Postmenopausal osteoporosis with pathological fracture | 43 | 43 | 43 | 41 |
| Fracture at wrist and hand level | 43 | 43 | 43 | 41 |
| Fracture of femur | 43 | 43 | 43 | 41 |
| Fracture of foot, except ankle | 43 | 43 | 43 | 41 |
| Fracture of forearm | 43 | 43 | 43 | 41 |
| Fracture of lower leg, including ankle | 43 | 43 | 43 | 41 |
| Fracture of lumbar spine and pelvis | 43 | 43 | 43 | 41 |
| Fracture of neck | 43 | 43 | 43 | 41 |
| Fracture of rib(s), sternum and thoracic spine | 43 | 43 | 43 | 41 |
| Fracture of shoulder and upper arm | 43 | 43 | 43 | 41 |
| Fracture of skull and facial bones | 43 | 43 | 43 | 41 |
| Fresh fruit intake | Osteoporosis | 55 | 52 | 52 | 51 |
| Osteoporosis with pathological fracture | 55 | 52 | 52 | 51 |
| Postmenopausal osteoporosis with pathological fracture | 55 | 52 | 52 | 51 |
| Fracture at wrist and hand level | 55 | 52 | 52 | 51 |
| Fracture of femur | 55 | 52 | 52 | 51 |
| Fracture of foot, except ankle | 55 | 52 | 52 | 51 |
| Fracture of forearm | 55 | 52 | 52 | 51 |
| Fracture of lower leg, including ankle | 55 | 52 | 52 | 51 |
| Fracture of lumbar spine and pelvis | 55 | 52 | 52 | 51 |
| Fracture of neck | 55 | 52 | 52 | 51 |
| Fracture of rib(s), sternum and thoracic spine | 55 | 52 | 52 | 51 |
| Fracture of shoulder and upper arm | 55 | 52 | 52 | 51 |
| Fracture of skull and facial bones | 55 | 52 | 52 | 51 |
| Salad/raw vegetable intake | Osteoporosis | 22 | 21 | 21 | 18 |
| Osteoporosis with pathological fracture | 22 | 21 | 21 | 18 |
| Postmenopausal osteoporosis with pathological fracture | 22 | 21 | 21 | 18 |
| Fracture at wrist and hand level | 22 | 21 | 21 | 18 |
| Fracture of femur | 22 | 21 | 21 | 18 |
| Fracture of foot, except ankle | 22 | 21 | 21 | 18 |
| Fracture of forearm | 22 | 21 | 21 | 18 |
| Fracture of lower leg, including ankle | 22 | 21 | 21 | 18 |
| Fracture of lumbar spine and pelvis | 22 | 21 | 21 | 18 |
| Fracture of neck | 22 | 21 | 21 | 18 |
| Fracture of rib(s), sternum and thoracic spine | 22 | 21 | 21 | 18 |
| Fracture of shoulder and upper arm | 22 | 21 | 21 | 18 |
| Fracture of skull and facial bones | 22 | 21 | 21 | 18 |
| Cooked vegetable intake | Osteoporosis | 17 | 17 | 17 | 17 |
| Osteoporosis with pathological fracture | 17 | 17 | 17 | 17 |
| Postmenopausal osteoporosis with pathological fracture | 17 | 17 | 17 | 17 |
| Fracture at wrist and hand level | 17 | 17 | 17 | 17 |
| Fracture of femur | 17 | 17 | 17 | 17 |
| Fracture of foot, except ankle | 17 | 17 | 17 | 17 |
| Fracture of forearm | 17 | 17 | 17 | 17 |
| Fracture of lower leg, including ankle | 17 | 17 | 17 | 17 |
| Fracture of lumbar spine and pelvis | 17 | 17 | 17 | 17 |
| Fracture of neck | 17 | 17 | 17 | 17 |
| Fracture of rib(s), sternum and thoracic spine | 17 | 17 | 17 | 17 |
| Fracture of shoulder and upper arm | 17 | 17 | 17 | 17 |
| Fracture of skull and facial bones | 17 | 17 | 17 | 17 |

Note: SNPs, single-nucleotide polymorphisms; LD, linkage disequilibrium.

**Supplement Table 3**. The results of the other MR methods of the relationship between fruit and vegetable intake and fracture risk.

| Exposure | Outcome | Methods | OR (95%CI) | *P* |
| --- | --- | --- | --- | --- |
| Dried fruit intake | Fracture of foot, except ankle | MR-Egger | 0.030 (0.001-0.633) | 0.0298 |
| Weighted median | 0.405 (0.153-1.069) | 0.0680 |
| Weighted mode | 0.348 (0.045-2.716) | 0.3202 |
| Fracture of lumbar spine and pelvis | MR-Egger | 0.342 (0.012-10.166) | 0.5392 |
| Weighted median | 0.429 (0.152-1.214) | 0.1107 |
| Weighted mode | 0.339 (0.042-2.751) | 0.3170 |
| Salad/raw vegetable intake | Postmenopausal osteoporosis with pathological fracture | MR-Egger | 96.389 (0.000-784089249.732) | 0.5814 |
| Weighted median | 0.056 (0.001-5.677) | 0.2210 |
| Weighted mode | 0.267 (0.000-750.823) | 0.7487 |
| Fracture of foot, except ankle | MR-Egger | 0.583 (0.001-389.381) | 0.8728 |
| Weighted median | 0.239 (0.035-1.615) | 0.1420 |
| Weighted mode | 0.098 (0.002-5.386) | 0.2719 |

Note: MR, Mendelian randomization; OR, odds ratio; CI, confidence interval.

**Supplement Table 4**. The MR Steiger directionality test of the causal association from dried fruit intake and salad/raw vegetable intake to fracture risk.

| Exposure | Outcome | Correct causal direction | Steiger *p-*value |
| --- | --- | --- | --- |
| Dried fruit intake | Fracture of foot, except ankle | TRUE | <0.001 |
| Fracture of lumbar spine and pelvis | TRUE | <0.001 |
| Salad/raw vegetable intake | Postmenopausal osteoporosis with pathological fracture | TRUE | <0.001 |
| Fracture of lumbar spine and pelvis | TRUE | <0.001 |

Note: MR, Mendelian randomization.
